# Supplementary material
Source: HighWire-hosted journal article supplement (https://ard.bmj.com/content/76/7/1245)
Supplement: inline-supplementary-material-1 [file inline-supplementary-material-1.pdf]

## WEB APPENDIX

|                                                                                                                                                          |    |
|----------------------------------------------------------------------------------------------------------------------------------------------------------|----|
| <b>List of contents</b> .....                                                                                                                            | 1  |
| Details on sick leave and disability pension<br>in the Swedish system.....                                                                               | 2  |
| Supplementary Figure S1. Flow-chart on the<br>patient inclusion process.....                                                                             | 3  |
| Supplementary Table S1. ICD and ATC codes<br>used to identify comorbidities.....                                                                         | 4  |
| Supplementary Table S2. Sensitivity analyses for<br>disease duration as a predictor .....                                                                | 5  |
| Supplementary Table S3. Predictors of 100%<br>work ability gain.....                                                                                     | 6  |
| Supplementary Table S4. Variables associated with<br>full-time disability pension at anti-TNF start .....                                                | 7  |
| Supplementary Table S5. Predictors of 100%<br>work ability loss.....                                                                                     | 8  |
| Supplementary Table S6. Predictors of $\geq 50\%$ work<br>ability gain with missing values imputed (corresponds<br>to Table 2 in the main article) ..... | 9  |
| Supplementary Table S7. Predictors of $\geq 50\%$ work<br>ability loss with missing values imputed (corresponds<br>to Table 3 in the main article) ..... | 10 |

## **Detailed data on sick leave and disability pension in Sweden**

In the Swedish social insurance system, the first day of sickness (“the qualifying day”) is unpaid. From day 2-14 the compensation is obtained directly from the employer (“sick pay period”). Hence, only disease periods >14 consecutive days are registered by the Social Insurance Agency. However, all days (from day 1 and on) are registered when an episode exceeds 14 days. Disability pension requires an expected duration of 1 year with at least 25% reduction in work ability. In Sweden an unemployed patient can be on sick leave but not on disability pension.

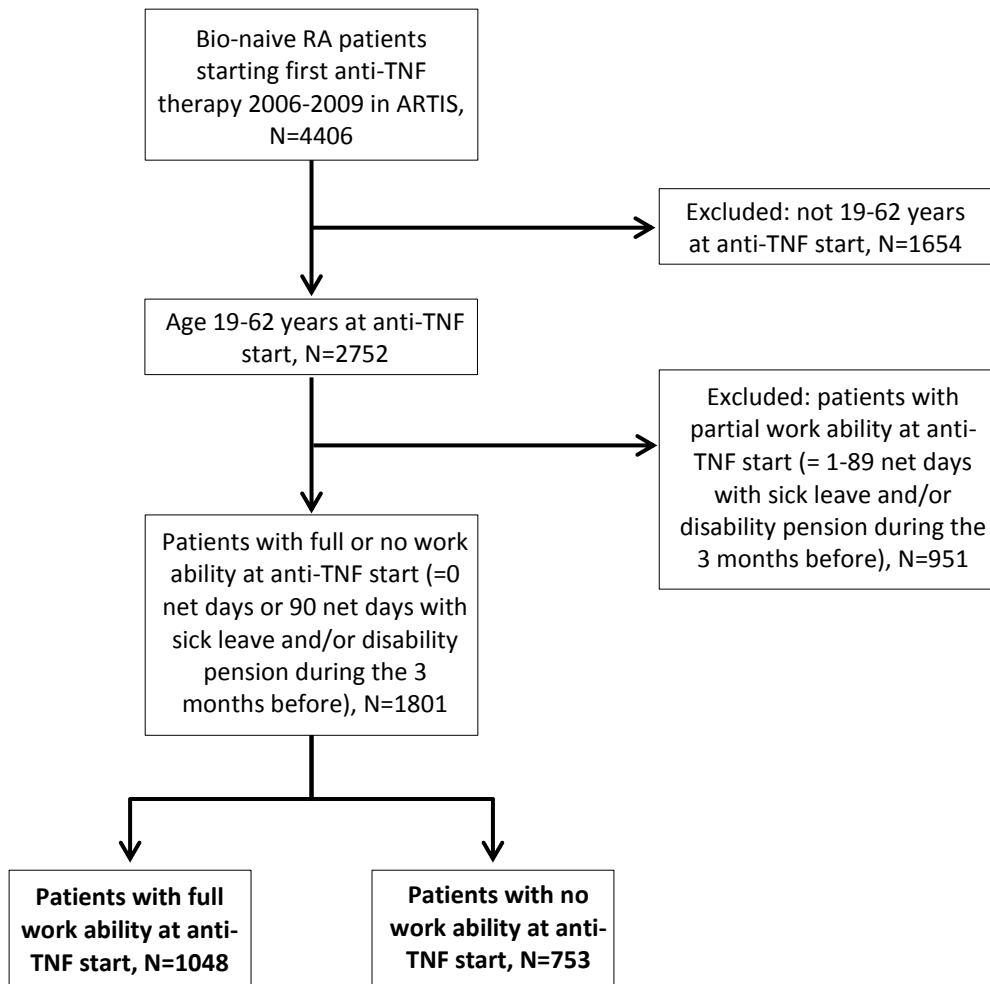

**Supplementary Figure S1** Flow-chart over the process of patient inclusion in the current study

**Supplementary Table S1** ICD10, ATC and Procedure codes used to identify comorbid disease via the National Patient Register (2001-2009) and the Prescribed Drug Register (2005-2009).

| <b>Disease</b>              | <b>ICD10*, ATC** and Procedure codes†</b>       |
|-----------------------------|-------------------------------------------------|
| Depression/anxiety disorder | ICD10: F31-F34, F41, F43 or<br>ATC: N06A, N05BA |
| Cardiovascular disease      | ICD10: I20-I25, I50, I60-I64                    |
| Malignancy                  | ICD10: C00-C97, D00-D09, D37-D48                |
| Hypertension                | ATC: C02-03, C07-09                             |
| Diabetes                    | ATC: A10AA-A10AF, A10BA-A10BX                   |
| Hip/Knee replacement        | Procedure code: NGB, NGC, NFB, NFC              |

\* Diagnosis set within 5 years before bio-start

\*\* Prescription within 6 months before bio-start

† Procedure performed ever

**Supplementary Table S2** Cox-regression results for disease duration as predictor of work ability gain and loss during 3 years after anti-TNF start, in working-age Swedish RA-patients starting therapy 2006-2009, shown for different cut-off points for disease duration.

| Disease duration | Work ability gain $\geq 50\%$ |         |                      |         |
|------------------|-------------------------------|---------|----------------------|---------|
|                  | Univariate                    |         | Multivariate (n=599) |         |
|                  | HR (95%CI)                    | p-value | HR (95%CI)           | p-value |
| <1y vs $\geq 1y$ | 2.73 (1.69-4.40)              | <0.001  | 1.29 (0.73-2.28)     | 0.38    |
| <2y vs $\geq 2y$ | 2.67 (1.85-3.86)              | <0.001  | 1.76 (1.14-2.71)     | 0.011   |
| <3y vs $\geq 3y$ | 2.73 (1.92-3.88)              | <0.001  | 1.83 (1.21-2.76)     | 0.004   |
| <4y vs $\geq 4y$ | 3.03 (2.13-4.30)              | <0.001  | 2.09 (1.38-3.15)     | <0.001  |
| <5y vs $\geq 5y$ | 2.96 (2.08-4.33)              | <0.001  | 2.13 (1.40-3.28)     | <0.001  |
| <7y vs $\geq 7y$ | 2.58 (1.79-3.72)              | <0.001  | 1.96 (1.27-3.04)     | <0.001  |

  

| Disease duration | Work ability loss $\geq 50\%$ |         |                      |         |
|------------------|-------------------------------|---------|----------------------|---------|
|                  | Univariate                    |         | Multivariate (n=857) |         |
|                  | HR (95%CI)                    | p-value | HR (95%CI)           | p-value |
| <1y vs $\geq 1y$ | 0.72 (0.42-1.23)              | 0.22    | 0.74 (0.53-1.03)     | 0.072   |
| <2y vs $\geq 2y$ | 1.00 (0.74-1.36)              | 0.99    | 0.93 (0.67-1.30)     | 0.68    |
| <3y vs $\geq 3y$ | 0.85 (0.65-1.12)              | 0.25    | 0.81 (0.60-1.09)     | 0.16    |
| <4y vs $\geq 4y$ | 0.88 (0.68-1.14)              | 0.32    | 0.89 (0.67-1.19)     | 0.44    |
| <5y vs $\geq 5y$ | 0.88 (0.68-1.14)              | 0.32    | 0.94 (0.71-1.24)     | 0.66    |
| <7y vs $\geq 7y$ | 0.83 (0.64-1.08)              | 0.16    | 0.88 (0.66-1.17)     | 0.37    |

**Supplementary Table S3.** Predictors of work ability gain 100% for RA patients with no work ability at bio-start\* assessed by Cox regression analysis during 3 years after bio-start for patients aged 18-62 years starting treatment 2006-2009 in Sweden.

|                                                                           | Work ability gain 100% |         |                        |                 |                                                    |         |
|---------------------------------------------------------------------------|------------------------|---------|------------------------|-----------------|----------------------------------------------------|---------|
|                                                                           | Univariate             |         | Multivariate (n=599)** |                 | Multivariate + disability pension status (n=599)** |         |
|                                                                           | HR (95%CI)             | p-value | HR (95%CI)             | p-value         | HR (95%CI)                                         | p-value |
| Disease duration <5y vs ≥5y                                               | 3.65 (2.33-5.73)       | <0.001  | 2.32 (1.40-3.85)       | 0.001           | 1.08 (0.64-1.83)                                   | 0.77    |
| Sex (men vs women)                                                        | 1.74 (1.10-2.78)       | 0.019   | 1.53 (0.88-2.67)       | 0.14            | 1.31 (0.74-2.31)                                   | 0.36    |
| Age (per 10y decrease)                                                    | 2.20 (1.84-2.65)       | <0.001  | 1.69 (1.32-2.15)       | <0.001          | 1.46 (1.08-1.96)                                   | 0.011   |
| <b>Education</b>                                                          |                        |         |                        |                 |                                                    |         |
| >12y vs ≤9y                                                               | 1.37 (0.65-2.90)       | 0.41    | 1.73 (0.75-3.99)       | 0.20            | 0.83 (0.35-1.96)                                   | 0.68    |
| >12y vs 10-12y                                                            | 0.73 (0.38-1.39)       | 0.33    | 0.94 (0.45-1.93)       | 0.86            | 0.72 (0.35-1.50)                                   | 0.38    |
| 10-12y vs ≤9y                                                             | 1.89 (1.11-3.21)       | 0.019   | 1.85 (1.00-3.41)       | 0.050           | 1.15 (0.62-2.14)                                   | 0.65    |
| <b>HAQ</b>                                                                |                        |         |                        |                 |                                                    |         |
| <1 vs 1-1.49                                                              | 2.10 (1.23-3.58)       | 0.007   | 1.42 (0.79-2.55)       | 0.24            | 1.27 (0.70-2.31)                                   | 0.44    |
| <1 vs ≥1.5                                                                | 1.49 (0.77-2.88)       | 0.24    | 1.12 (0.54-2.33)       | 0.76            | 0.85 (0.41-1.76)                                   | 0.66    |
| 1-1.49 vs ≥1.5                                                            | 0.71 (0.39-1.29)       | 0.26    | 0.79 (0.42-1.50)       | 0.47            | 0.67 (0.35-1.29)                                   | 0.23    |
| <b>DAS28<sup>†</sup></b>                                                  |                        |         |                        |                 |                                                    |         |
| ≤3.2 vs 3.3-5.1                                                           | 1.23 (0.48-3.17)       | 0.67    | 0.63 (0.21-1.83)       | 0.40            | 0.69 (0.23-2.04)                                   | 0.50    |
| ≤3.2 vs >5.1                                                              | 1.54 (0.61-3.90)       | 0.36    | 0.64 (0.22-1.82)       | 0.40            | 0.75 (0.26-2.21)                                   | 0.61    |
| 3.3-5.1 vs >5.1                                                           | 1.25 (0.78-2.00)       | 0.35    | 1.01 (0.61-1.66)       | 0.98            | 1.10 (0.67-1.81)                                   | 0.71    |
| <b>Comorbidities</b>                                                      |                        |         |                        |                 |                                                    |         |
| Depression/Anxiety disorder (yes vs none)                                 | 0.78 (0.46-1.31)       | 0.34    | 0.82 (0.46-1.48)       | 0.51            | 1.10 (0.60-2.03)                                   | 0.75    |
| Hypertension (yes vs no)                                                  | 0.61 (0.37-1.00)       | 0.050   | 0.83 (0.46-1.51)       | 0.55            | 0.68 (0.37-1.25)                                   | 0.215   |
| Hip/Knee replacement (yes vs no)                                          | 0.06 (0.08-0.42)       | 0.005   | 0.16 (0.02-1.20)       | 0.075           | 0.18 (0.024-1.33)                                  | 0.093   |
| <b>Work related variables</b>                                             |                        |         |                        |                 |                                                    |         |
| Unemployment (any vs none) <sup>††</sup>                                  | 5.03 (3.35-8.41)       | <0.001  | 1.83 (1.04-3.24)       | 0.037           | 1.01 (0.62-1.94)                                   | 0.74    |
| Disability pension status (sick leave vs disability pension) <sup>‡</sup> | 20.2 (10.5-39.1)       | <0.001  | NA <sup>§</sup>        | NA <sup>§</sup> | 16.9 (7.57-37.8)                                   | <0.001  |

Adjustment for year of bio-start was performed in all regressions.

\* No work ability at bio-start=90 days with sick leave and disability pension during 3 months before bio-start.

\*\* Missingness 154/753=20%

† Analysed in separate regression model not including HAQ.

†† Any days with unemployment benefit the calendar year prior to the year of bio-start

‡ Full sick leave or a combination of partial sick leave and partial disability pension vs. full disability pension.

§ Not applicable

**Supplementary Table S4** Variables associated with full-time disability pension at anti-TNF start in RA patients (18-62 years) with no work ability\* when starting treatment 2006-2009.

|                                         | Full-time disability pension at bio-start (yes vs. no) |         |
|-----------------------------------------|--------------------------------------------------------|---------|
|                                         | OR (95%CI)                                             | p-value |
| Disease duration (≥5y vs <5y)           | 4.85 (3.16-7.43)                                       | <0.001  |
| Sex (women vs men)                      | 1.33 (0.79-2.24)                                       | 0.291   |
| Age (per 10y increase)                  | 1.60 (1.23-2.06)                                       | <0.001  |
| <b>Education</b>                        |                                                        |         |
| ≤9y vs >12y                             | 3.85 (1.94-7.64)                                       | <0.001  |
| 10-12y vs >12y                          | 1.54 (0.85-2.77)                                       | 0.16    |
| ≤9y vs 10-12y                           | 2.51 (1.52-4.13)                                       | <0.001  |
| <b>HAQ</b>                              |                                                        |         |
| ≥1.5 vs <1                              | 2.39 (1.20-4.76)                                       | 0.013   |
| 1-1.49 vs <1                            | 2.01 (1.22-3.50)                                       | 0.007   |
| ≥1.5 vs 1-1.49                          | 1.16 (0.65-2.06)                                       | 0.62    |
| <b>Comorbidities</b>                    |                                                        |         |
| Depression/anxiety disorder (yes vs no) | 1.51 (0.92-2.46)                                       | 0.10    |
| Hypertension (yes vs no)                | 0.91 (0.59-1.42)                                       | 0.91    |
| Hip/knee replacement (yes vs no)        | 1.35 (0.70-2.60)                                       | 0.37    |
| <b>Work-related variables</b>           |                                                        |         |
| Unemployment (any vs none)**            | 7.31 (3.22-16.6)                                       | <0.001  |

\* 90 days with sick leave or disability pension during the 3 months prior to anti-TNF start

\*\* Any days with unemployment benefit the calendar year prior to the year of bio-start

**Supplementary Table S5.** Predictors of work ability loss 100% for RA patients with full work ability at bio-start\* assessed by Cox regression analysis during 3 years after bio-start for patients aged 18-62 years starting treatment 2006-2009 in Sweden.

|                                           | Work ability loss 100% |         |                        |         |
|-------------------------------------------|------------------------|---------|------------------------|---------|
|                                           | Univariate             |         | Multivariate (n=857)** |         |
|                                           | HR (95%CI)             | p-value | HR (95%CI)             | p-value |
| Disease duration <5y vs ≥5y               | 1.31 (0.84-2.05)       | 0.24    | 1.47 (0.88-2.44)       | 0.14    |
| Sex (men vs women)                        | 1.20 (0.76-1.92)       | 0.44    | 1.14 (0.66-1.97)       | 0.65    |
| Age (per 10y increase)                    | 1.00 (0.99-1.02)       | 0.69    | 1.01 (0.99-1.03)       | 0.47    |
| <b>Education</b>                          |                        |         |                        |         |
| >12y vs ≤9y                               | 0.59 (0.29-1.18)       | 0.13    | 1.03 (0.45-2.36)       | 0.94    |
| >12y vs 10-12y                            | 0.48 (0.29-0.79)       | 0.004   | 0.57 (0.33-0.99)       | 0.045   |
| 10-12y vs ≤9y                             | 1.22 (0.65-2.32)       | 0.54    | 1.82 (0.83-3.98)       | 0.14    |
| <b>HAQ</b>                                |                        |         |                        |         |
| <1 vs 1-1.49                              | 0.55 (0.33-0.94)       | 0.028   | 0.66 (0.38-1.5)        | 0.14    |
| <1 vs ≥1.5                                | 0.56 (0.29-1.09)       | 0.086   | 0.64 (0.31-1.29)       | 0.21    |
| 1-1.49 vs ≥1.5                            | 1.01 (0.50-2.00)       | 0.99    | 0.96 (0.47-1.99)       | 0.92    |
| <b>DAS28<sup>†</sup></b>                  |                        |         |                        |         |
| ≤3.2 vs 3.3-5.1                           | 0.44 (0.19-2.08)       | 0.62    | 0.73 (0.22-2.48)       | 0.61    |
| ≤3.2 vs >5.1                              | 0.28 (0.09-0.90)       | 0.033   | 0.34 (0.10-1.13)       | 0.078   |
| 3.3-5.1 vs >5.1                           | 0.45 (0.27-0.76)       | 0.003   | 0.47 (0.27-0.81)       | 0.006   |
| <b>Comorbidities</b>                      |                        |         |                        |         |
| Depression/Anxiety disorder (any vs none) | 2.09 (1.11-3.95)       | 0.023   | 2.25 (1.13-4.50)       | 0.021   |
| Hypertension (yes vs no)                  | 1.10 (0.60-2.03)       | 0.76    | 1.33 (0.67-2.64)       | 0.42    |
| Hip/Knee replacement (yes vs no)          | 2.69 (1.34-5.37)       | 0.005   | 3.66 (1.51-8.87)       | 0.004   |
| <b>Work related variables</b>             |                        |         |                        |         |
| Unemployment (any vs none) <sup>††</sup>  | 3.53 (2.11-5.91)       | <0.001  | 4.12 (2.25-7.54)       | <0.001  |

Adjustment for year of bio-start was performed in all regressions.

\* Full work ability at bio-start=0 days with sick leave and disability pension during 3 months before bio-start.

\*\* Missingness 191/1048=18%

† Analysed in separate regression model not including HAQ.

†† Any days with unemployment benefit the calendar year prior to the year of bio-start



**Supplementary Table S6.** Predictors of work ability gain  $\geq 50\%$  for RA patients with no work ability at bio-start\* assessed by Cox regression analysis during 3 years after bio-start for patients aged 18-62 years starting treatment 2006-2009 in Sweden. Missing values are replaced through multiple imputation. This table corresponds to Table 2 in the main article.

|                                                                           | Work ability gain $\geq 50\%$ |         |                  |                 |                                            |         |
|---------------------------------------------------------------------------|-------------------------------|---------|------------------|-----------------|--------------------------------------------|---------|
|                                                                           | Univariate**                  |         | Multivariate**   |                 | Multivariate + disability pension status** |         |
|                                                                           | HR (95%CI)                    | p-value | HR (95%CI)       | p-value         | HR (95%CI)                                 | p-value |
| Disease duration <5y vs $\geq 5y$                                         | 2.90 (2.04-4.13)              | <0.001  | 2.01 (1.38-2.92) | <0.001          | 1.05 (0.69-1.50)                           | 0.93    |
| Sex (men vs women)                                                        | 1.54 (1.04-2.28)              | 0.037   | 1.58 (1.06-2.37) | 0.026           | 1.25 (0.82-1.90)                           | 0.30    |
| Age (per 10y decrease)                                                    | 2.08 (1.78-2.44)              | <0.001  | 1.77 (1.47-2.13) | <0.001          | 1.52 (1.27-1.82)                           | <0.001  |
| <b>Education</b>                                                          |                               |         |                  |                 |                                            |         |
| >12y vs $\leq 9y$                                                         | 1.46 (0.81-2.65)              | 0.21    | 1.32 (0.72-2.43) | 0.37            | 0.76 (0.41-1.42)                           | 0.40    |
| >12y vs 10-12y                                                            | 0.82 (0.49-1.36)              | 0.44    | 0.93 (0.55-1.57) | 0.78            | 0.76 (0.45-1.30)                           | 0.32    |
| 10-12y vs $\leq 9y$                                                       | 1.79 (1.17-2.74)              | 0.008   | 1.43 (0.92-2.22) | 0.11            | 1.00 (0.64-1.57)                           | 0.99    |
| <b>HAQ</b>                                                                |                               |         |                  |                 |                                            |         |
| <1 vs 1-1.49                                                              | 1.92 (1.28-2.88)              | 0.002   | 1.37 (0.87-2.16) | 0.18            | 1.11 (0.70-1.77)                           | 0.65    |
| <1 vs $\geq 1.5$                                                          | 1.67 (0.96-2.89)              | 0.069   | 1.25 (0.68-2.28) | 0.47            | 1.04 (0.57-1.90)                           | 0.89    |
| 1-1.49 vs $\geq 1.5$                                                      | 0.87 (0.53-1.44)              | 0.59    | 0.91 (0.54-1.54) | 0.73            | 0.94 (0.54-1.63)                           | 0.81    |
| <b>DAS28<sup>†</sup></b>                                                  |                               |         |                  |                 |                                            |         |
| $\leq 3.2$ vs 3.3-5.1                                                     | 1.13 (0.50-2.56)              | 0.78    | 0.68 (0.28-1.68) | 0.40            | 0.63 (0.25-1.60)                           | 0.32    |
| $\leq 3.2$ vs >5.1                                                        | 1.30 (0.57-2.96)              | 0.52    | 0.65 (0.26-1.63) | 0.36            | 0.62 (0.24-1.62)                           | 0.40    |
| 3.3-5.1 vs >5.1                                                           | 1.16 (0.78-1.72)              | 0.46    | 0.95 (0.65-1.40) | 0.80            | 0.98 (0.68-1.47)                           | 0.99    |
| <b>Comorbidities</b>                                                      |                               |         |                  |                 |                                            |         |
| Depression/Anxiety disorder (any vs none)                                 | 0.66 (0.43-1.03)              | 0.068   | 0.54 (0.34-0.87) | 0.011           | 0.68 (0.42-1.10)                           | 0.12    |
| Hypertension (yes vs no)                                                  | 0.66 (0.45-0.98)              | 0.037   | 1.01 (0.66-1.53) | 0.97            | 0.95 (0.62-1.45)                           | 0.81    |
| Hip/Knee replacement (yes vs no)                                          | 0.24 (0.10-0.54)              | 0.001   | 0.48 (0.21-1.11) | 0.086           | 0.55 (0.23-1.28)                           | 0.16    |
| <b>Work related variables</b>                                             |                               |         |                  |                 |                                            |         |
| Unemployment (any vs none) <sup>††</sup>                                  | 4.97 (3.37-7.34)              | <0.001  | 2.06 (1.34-3.17) | <0.001          | 1.16 (0.77-1.78)                           | 0.47    |
| Disability pension status (sick leave vs disability pension) <sup>‡</sup> | 18.4 (11.2-30.2)              | <0.001  | NA <sup>§</sup>  | NA <sup>§</sup> | 15.0 (8.72-25.7)                           | <0.001  |

Adjustment for year of bio-start was performed in all regressions.

\* No work ability at bio-start=90 days with sick leave and disability pension during 3 months before bio-start.

\*\* Missing values replaced through multiple imputation. Number of replacements: disease duration=22, HAQ=129, DAS28=145, Education level=4.

† Analysed in separate regression model not including HAQ.

†† Any days with unemployment benefit the calendar year prior to the year of bio-start

‡ Full sick leave or a combination of partial sick leave and partial disability pension vs. full disability pension.

§ Not applicable

**Supplementary Table S7.** Predictors of work ability loss  $\geq 50\%$  for RA patients with full work ability at bio-start\* assessed by Cox regression analysis during 3 years after bio-start for patients aged 18-62 years starting treatment 2006-2009 in Sweden. Missing values are replaced through multiple imputation. This table corresponds to Table 3 in the main article.

|                                           | Work ability loss $\geq 50\%$ |         |                  |         |
|-------------------------------------------|-------------------------------|---------|------------------|---------|
|                                           | Univariate**                  |         | Multivariate**   |         |
|                                           | HR (95%CI)                    | p-value | HR (95%CI)       | p-value |
| Disease duration <5y vs $\geq 5y$         | 0.87 (0.67-1.12)              | 0.28    | 0.95 (0.73-1.24) | 0.70    |
| Sex (men vs women)                        | 0.84 (0.63-1.13)              | 0.24    | 0.79 (0.58-1.05) | 0.10    |
| Age (per 10y increase)                    | 1.13 (1.01-1.27)              | 0.034   | 1.08 (0.95-1.22) | 0.23    |
| <b>Education</b>                          |                               |         |                  |         |
| >12y vs $\leq 9y$                         | 0.71 (0.47-1.05)              | 0.088   | 0.78 (0.52-1.18) | 0.24    |
| >12y vs 10-12y                            | 0.59 (0.45-0.78)              | <0.001  | 0.56 (0.42-0.74) | <0.001  |
| 10-12y vs $\leq 9y$                       | 1.20 (0.82-1.76)              | 0.34    | 1.39 (0.94-2.06) | 0.097   |
| <b>HAQ</b>                                |                               |         |                  |         |
| <1 vs 1-1.49                              | 0.60 (0.45-0.80)              | 0.001   | 0.68 (0.51-0.92) | 0.012   |
| <1 vs $\geq 1.5$                          | 0.61 (0.42-0.90)              | 0.014   | 0.66 (0.45-0.98) | 0.038   |
| 1-1.49 vs $\geq 1.5$                      | 1.02 (0.68-1.55)              | 0.90    | 0.97 (0.64-1.46) | 0.88    |
| <b>DAS28<sup>†</sup></b>                  |                               |         |                  |         |
| $\leq 3.2$ vs 3.3-5.1                     | 0.93 (0.56-1.53)              | 0.77    | 0.95 (0.57-1.59) | 0.85    |
| $\leq 3.2$ vs >5.1                        | 0.60 (0.36-0.98)              | 0.041   | 0.64 (0.38-1.07) | 0.09    |
| 3.3-5.1 vs >5.1                           | 0.64 (0.48-0.86)              | 0.003   | 0.67 (0.50-0.90) | 0.008   |
| <b>Comorbidities</b>                      |                               |         |                  |         |
| Depression/Anxiety disorder (any vs none) | 1.47 (0.97-2.24)              | 0.073   | 1.37 (0.90-2.11) | 0.15    |
| Hypertension (yes vs no)                  | 1.62 (1.18-2.28)              | 0.003   | 1.46 (1.04-2.07) | 0.030   |
| Hip/Knee replacement (yes vs no)          | 1.93 (1.21-3.09)              | 0.006   | 1.93 (1.18-3.16) | 0.008   |
| <b>Work related variables</b>             |                               |         |                  |         |
| Unemployment (any vs none) <sup>††</sup>  | 1.80 (1.24-2.61)              | 0.002   | 1.79 (1.21-2.65) | 0.003   |

Adjustment for year of bio-start was performed in all regressions.

\* Full work ability at bio-start=0 days with sick leave and disability pension during 3 months before bio-start.

\*\* Missing values replaced through multiple imputation. Number of replacements: disease duration= 12, HAQ=169. DAS28=186, Education level=13.

† Analysed in separate regression model not including HAQ.

†† Any days with unemployment benefit the calendar year prior to the year of bio-start
